# Supplementary material
Source: HighWire-hosted journal article supplement (https://diabetes.diabetesjournals.org/content/suppl/2005/07/28/54.8.2482)
Supplement: db1329AppendixC.pdf [file db1329AppendixC.pdf]

**Appendix 1: Genotype frequencies in controls and cases (persistent islet autoimmunity including T1D)**

| SNP         | Genotype | DR3/DR4 heterozygotes |       |                         | Other HLA genotypes |       |                         |
|-------------|----------|-----------------------|-------|-------------------------|---------------------|-------|-------------------------|
|             |          | Controls              | Cases | OR (95% CI)             | Controls            | Cases | OR (95% CI)             |
| CTLA4-318   | CT/TT    | 12.0                  | 22.5  | 2.13 (0.77-5.89)        | 18.7                | 17.7  | 0.94 (0.42-2.07)        |
| CTLA4 ex.1  | AG/GG    | 61.3                  | 62.5  | 1.05 (0.48-2.32)        | 65.9                | 61.3  | 0.82 (0.44-1.54)        |
| INS HphI    | AT/TT    | 54.7                  | 32.5  | <b>0.40 (0.18-0.89)</b> | 45.5                | 43.5  | 0.92 (0.50-1.71)        |
| IL4R -3223  | CT/TT    | 48.0                  | 42.5  | 0.80 (0.37-1.73)        | 44.7                | 62.9  | <b>2.10 (1.12-3.92)</b> |
| IL4R -1914  | CT/TT    | 64.0                  | 72.5  | 1.48 (0.64-3.43)        | 71.5                | 56.5  | <b>0.52 (0.27-0.97)</b> |
| IL4R 50     | AG/GG    | 73.3                  | 65.0  | 0.68 (0.29-1.54)        | 67.5                | 82.3  | <b>2.23 (1.05-4.74)</b> |
| IL4R 142    | CT/TT    | 17.3                  | 15.0  | 0.84 (0.29-2.41)        | 21.1                | 19.4  | 0.89 (0.42-1.92)        |
| IL4R 375    | AC/CC    | 22.7                  | 22.5  | 0.99 (0.40-2.48)        | 21.1                | 27.4  | 1.41 (0.69-2.86)        |
| IL4R 389    | GT/TT    | 22.7                  | 22.5  | 0.99 (0.40-2.48)        | 21.1                | 27.4  | 1.41 (0.69-2.86)        |
| IL4R 406    | TC/CC    | 21.3                  | 22.5  | 1.07 (0.42-2.70)        | 21.1                | 24.2  | 1.19 (0.58-2.46)        |
| IL4R 478    | TC/CC    | 30.7                  | 32.5  | 1.09 (0.48-2.48)        | 32.5                | 35.5  | 1.14 (0.60-2.17)        |
| IL4R 551    | AG/GG    | 34.7                  | 40.0  | 1.25 (0.57-2.77)        | 43.9                | 45.2  | 1.05 (0.57-1.94)        |
| IL4R 761    | TC/CC    | 1.3                   | 2.5   | N/A                     | 1.6                 | 0.0   | N/A                     |
| IL4 -524    | CT/TT    | 37.3                  | 22.5  | 0.49 (0.20-1.17)        | 30.1                | 40.3  | 1.57 (0.83-2.97)        |
| IL13 -1512  | AC/CC    | 29.3                  | 40.0  | 1.61 (0.72-3.59)        | 30.9                | 32.3  | 1.06 (0.55-2.05)        |
| IL13 -1112  | CT/TT    | 33.3                  | 40.0  | 1.33 (0.60-2.95)        | 31.7                | 32.3  | 1.02 (0.53-1.97)        |
| IL13 intr.3 | CT/TT    | 42.7                  | 35.0  | 0.72 (0.33-1.60)        | 35.8                | 33.9  | 0.92 (0.48-1.75)        |
| IL13 110    | GA/AA    | 41.3                  | 35.0  | 0.76 (0.34-1.69)        | 35.0                | 32.3  | 0.89 (0.46-1.69)        |

Genotype frequencies are shown after stratification for HLA-DR3/4 status. Since several cells had values < 5 in the homozygote variant, both heterozygotes and homozygotes variant have been combined for analysis. ORs refer to the combined variant group. Statistically significant OR values (P < 0.05) are indicated in bold.

**Appendix 2: Pairwise linkage disequilibrium between IL4 and IL13 SNPs**

|                   | <b>IL4 -524</b> | <b>IL13 -1512</b> | <b>IL13 -1112</b> | <b>IL13 int3</b> | <b>IL13 110</b> |
|-------------------|-----------------|-------------------|-------------------|------------------|-----------------|
| <b>IL4 -524</b>   |                 | 0.15*             | 0.20*             | 0.53**           | 0.43**          |
| <b>IL13 -1512</b> | 0.02            |                   | 0.96**            | 0.57**           | 0.58**          |
| <b>IL13 -1112</b> | 0.03            | 0.13              |                   | 0.48**           | 0.47**          |
| <b>IL13 int3</b>  | 0.07            | 0.07              | 0.07              |                  | 1.00**          |
| <b>IL13 110</b>   | 0.06            | 0.08              | 0.07              | 0.16             |                 |

Upper right triangle: absolute D' (standardized LD,  $D' = D/D_{max}$ )

Lower left triangle: D. Values refer to the reference allele.

Statistically significant LD values are indicated with \*  $P < 0.05$  and \*\*  $P < 0.0001$

**Appendix 3: Pairwise linkage disequilibrium between IL4R SNPs**

|              | <b>-3223</b> | <b>-1914</b> | <b>50</b> | <b>142</b> | <b>375</b> | <b>389</b> | <b>406</b> | <b>478</b> | <b>551</b> | <b>761</b> |
|--------------|--------------|--------------|-----------|------------|------------|------------|------------|------------|------------|------------|
| <b>-3223</b> |              | 0.04         | 0.90**    | 0.98**     | 0.29       | 0.29       | 0.27       | 0.48*      | 0.56*      | 0.45       |
| <b>-1914</b> | - 0.005      |              | 0.09      | 0.04       | 0.12       | 0.12       | 0.15       | 0.16       | 0.24*      | 0.23       |
| <b>50</b>    | 0.13         | - 0.02       |           | 1.00**     | 0.12       | 0.12       | 0.10       | 0.35*      | 0.07       | 0.18       |
| <b>142</b>   | - 0.03       | - 0.002      | 0.06      |            | 1.00*      | 1.00*      | 1.00*      | 0.40**     | 0.32*      | 0.33       |
| <b>375</b>   | - 0.01       | 0.01         | 0.01      | - 0.01     |            | 1.00**     | 1.00**     | 0.98**     | 1.00**     | 1.00       |
| <b>389</b>   | - 0.01       | 0.01         | 0.01      | - 0.01     | 0.10       |            | 1.00**     | 0.98**     | 1.00**     | 1.00       |
| <b>406</b>   | - 0.01       | 0.01         | 0.01      | - 0.01     | 0.10       | 0.10       |            | 1.00**     | 1.00**     | 1.00       |
| <b>478</b>   | - 0.02       | 0.01         | 0.03      | 0.03       | 0.09       | 0.09       | 0.09       |            | 0.96**     | 0.86*      |
| <b>551</b>   | - 0.04       | 0.03         | 0.01      | 0.03       | 0.09       | 0.09       | 0.09       | 0.13       |            | 0.16       |
| <b>761</b>   | - 0.001      | - 0.001      | 0.001     | 0.002      | - 0.001    | - 0.001    | - 0.001    | 0.01       | - 0.000    |            |

Upper right triangle: absolute D' (standardized LD,  $D' = D/D_{max}$ )

Lower left triangle: D. Values refer to the reference allele.

Statistically significant LD values are indicated with \*  $P < 0.05$  and \*\*  $P < 0.0001$
